# Supplementary material for: A new class of amide-based organogels: from oil spill recovery to self-assembly structure analysis
Source: Royal Society of Chemistry journal article supplement (doi:10.1039/d2ta10000b), 2023-01-01
Supplement: d2ta10000b1.pdf [file d2ta10000b1.pdf]

## 12 Experimental Details

### 13 1. Materials

14 Kerosene and DMTMM were purchased from Macklin (P.R. China). Paraffin oil (its density is  
15 0.830–0.860 g/cm<sup>3</sup>), benzene, toluene and cyclohexane are purchased from Sinopharm Chemical Reagent  
16 Co., Ltd. (Beijing, P.R. China), undecane, dodecane, tridecane, tetradecane, pentadecane, hexadecane, p-  
17 aminobenzoic acid, ethanol, THF, n-tridecane, n-tetradecane, 2-aminopropane-1,3-diol, ethyl  
18 acetate, palmitoyl chloride, oleoyl chloride, stearoyl chloride, methanol and sodium hydroxide are all  
19 accessible from Aladdin (Shanghai, P.R. China). Acetone was purchased from Qingdao Zhengye Reagent  
20 Instrument Co., Ltd. A neighborhood gas station provided the diesel (0#). Other solvents were purchased  
21 from local distributors. All reagents were not further purified.

### 22 2. Synthesis

23 **Compound 4-stearamidobenzoic acid:** 30.00 mL acetone/water (volume ratio: 1:1) solution was  
24 added to a three-necked flask with 25.00 mmol p-aminobenzoic acid and 1.00 g NaOH. The reaction  
25 mixture was cooled to 0-15 °C. Then 26.00 mmol stearoyl chloride and 10 ml acetone was added dropwise,  
26 the reaction mixture was adjusted with NaOH about pH = 8-10, the temperature is slowly raised to 20.00-  
27 25.00 °C. After the solution is added dropwise, then the solution stayed at 25.00°C, monitored by TLC.  
28 The temperature was decreased to 0.0-15.0°C after the response has passed, and 1.00 mol·L<sup>-1</sup> HCl was  
29 added dropwise to pH= 1-2. After an hour, the white solid was collected by filtration. The white solid was  
30 washed with deionized water. Yield: 9.25 g (22.92 mmol 91.67 %).

31 Compounds 4-oleamidobenzoic acid and compound 4-palmitamidobenzoic acid were made using the  
32 same procedure.

33 **Compound 4-oleamidobenzoic acid:** Yield: 9.07 g (22.59 mmol 90.34%)

34 **Compound 4-palmitamidobenzoic acid:** Yield: 8.97 g (23.88 mmol 95.54%)

35 **Compound N-(1,3-dihydroxypropan-2-yl)-4-stearamidobenzamide (A<sub>18</sub>, Fig. S1 and S2):** A<sub>18</sub>  
36 was synthesized according to the literature<sup>1, 2</sup>. 2.00 g (5.95 mmol) 2-aminopropane-1,3-diol and 5.95  
37 mmol 4-stearamidobenzoic acid and (4,6-dimethoxy-1,3,5-triazin-2-yl) DMTMM was added to 80.0 mL  
38 THF in a three-necked flask. The reaction mixture was stirred at room temperature and monitored by TLC.  
39 After the reaction is finished, Filtration was used to collect the solid, which was then washed with ethanol.  
40 The filter cake was recrystallized with ethanol. <sup>1</sup>H NMR (400 MHz, DMSO-*d*<sub>6</sub>) δ 10.05 (s, 1H), 7.80 (t, J  
41 = 7.9 Hz, 3H), 7.68 – 7.62 (m, 2H), 4.64 (t, J = 5.7 Hz, 2H), 3.94 (dq, J = 7.8, 5.7 Hz, 1H), 3.51 (t, J = 5.8  
42 Hz, 4H), 2.54 – 2.48 (m, 3H), 2.32 (t, J = 7.4 Hz, 2H), 1.59 (p, J = 7.2 Hz, 2H), 1.24 (s, 28H), 0.90 – 0.82

43 (m, 3H). Yield: 1.61 g (3.38 mmol 68.16%).

44 **Compound N-(1,3-dihydroxypropan-2-yl)-4-oleamidobenzamide (B<sub>18</sub>, Fig S3 and S4):** B<sub>18</sub> was  
45 synthesized according to the literature<sup>1, 2</sup>. 2 g (4.98 mmol) 4-oleamidobenzoic acid, 5.98 mmol of 2-  
46 aminopropane-1,3-diol and 5.98 mmol DMTMM in 50 ml methanol were added to three-necked flask.  
47 The reaction mixture was stirred at room temperature and monitored by TLC. After the reaction is finished,  
48 Filtration was used to collect the solid, which was then washed with ethanol. The filter cake was  
49 recrystallized with ethanol.<sup>1</sup>H NMR (400 MHz, DMSO-*d*<sub>6</sub>) δ 10.06 (s, 1H), 7.88 – 7.76 (m, 3H), 7.66 (d,  
50 *J* = 8.3 Hz, 2H), 5.38 – 5.30 (m, 2H), 4.62 (s, 2H), 3.95 (p, *J* = 6.4 Hz, 1H), 3.52 (d, *J* = 5.5 Hz, 4H), 2.32  
51 (t, *J* = 7.4 Hz, 2H), 1.97 (dt, *J* = 19.0, 5.8 Hz, 4H), 1.59 (t, *J* = 7.1 Hz, 2H), 1.35 – 1.15 (m, 22H), 0.84 (d,  
52 *J* = 6.7 Hz, 3H). Yield: 1.47 g (3.10 mmol 62.18%).

53 Compounds N-(1,3-dihydroxypropan-2-yl)-4-palmitamidobenzamide (A<sub>16</sub>, Fig S5 and S6) were made  
54 using the same procedure. <sup>1</sup>H NMR (400 MHz, DMSO-*d*<sub>6</sub>) δ 10.10 (d, *J* = 41.0 Hz, 1H), 7.91 – 7.76 (m,  
55 3H), 7.68 (dd, *J* = 19.8, 8.6 Hz, 2H), 4.63 (d, *J* = 5.7 Hz, 2H), 3.52 (t, *J* = 4.9 Hz, 1H), 3.40 – 3.28 (m,  
56 4H), 2.51 (p, *J* = 1.8 Hz, 2H), 2.32 (td, *J* = 7.4, 5.3 Hz, 2H), 2.06 (t, *J* = 7.4 Hz, 1H), 1.59 (t, *J* = 7.2 Hz,  
57 2H), 1.24 (s, 24H), 0.85 (d, *J* = 7.0 Hz, 3H). Yield: 2.07 g (4.61 mmol 86.64%).

58

## 59 References

- 60 1. M. Kunishima, C. Kawachi, K. Hioki, K. Terao and S. Tani, *Tetrahedron*, 2001,  
61 **57**, 1551-1558.  
62 2. M. Kunishima, C. Kawachi, J. Monta, K. Terao, F. Iwasaki and S. Tani,  
63 *Tetrahedron*, 1999, **55**, 13159-13170.  
64

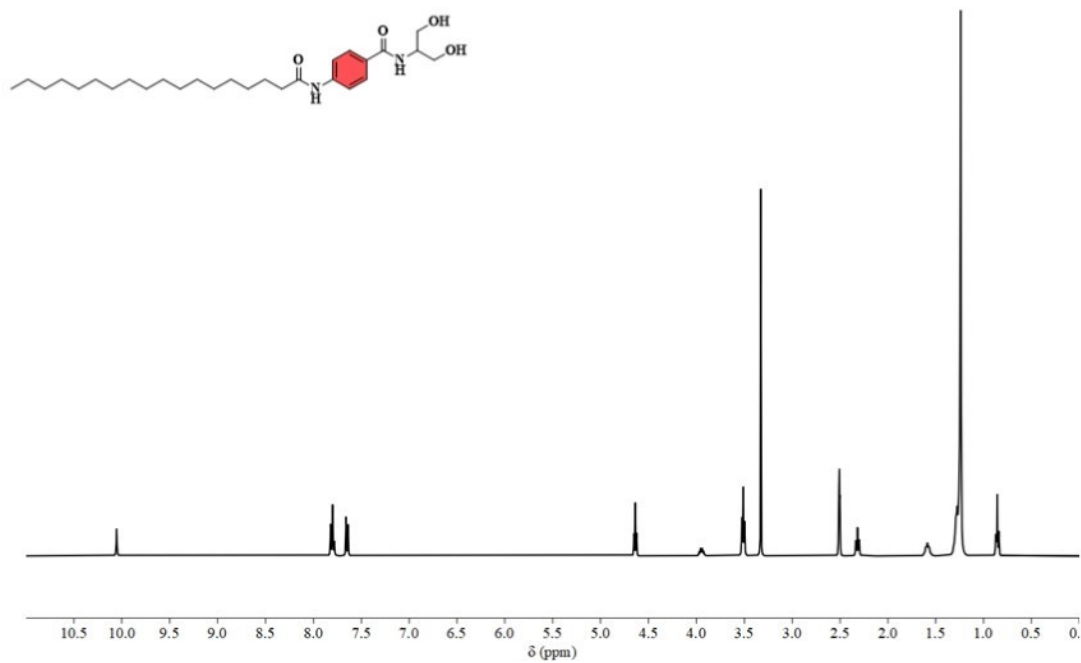

65

66

**Fig. S1** <sup>1</sup>H NMR spectrum of A<sub>18</sub> in DMSO-d<sub>6</sub> solvent.

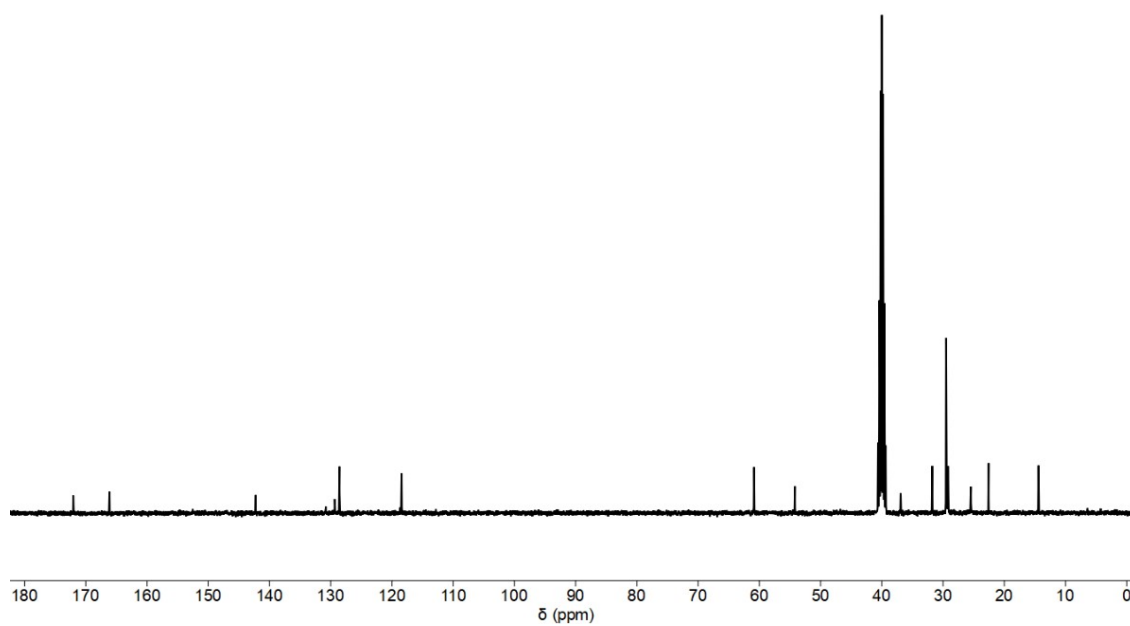

67

68

69

**Fig. S2** <sup>13</sup>C NMR spectrum of A<sub>18</sub> in DMSO-d<sub>6</sub> solvent.

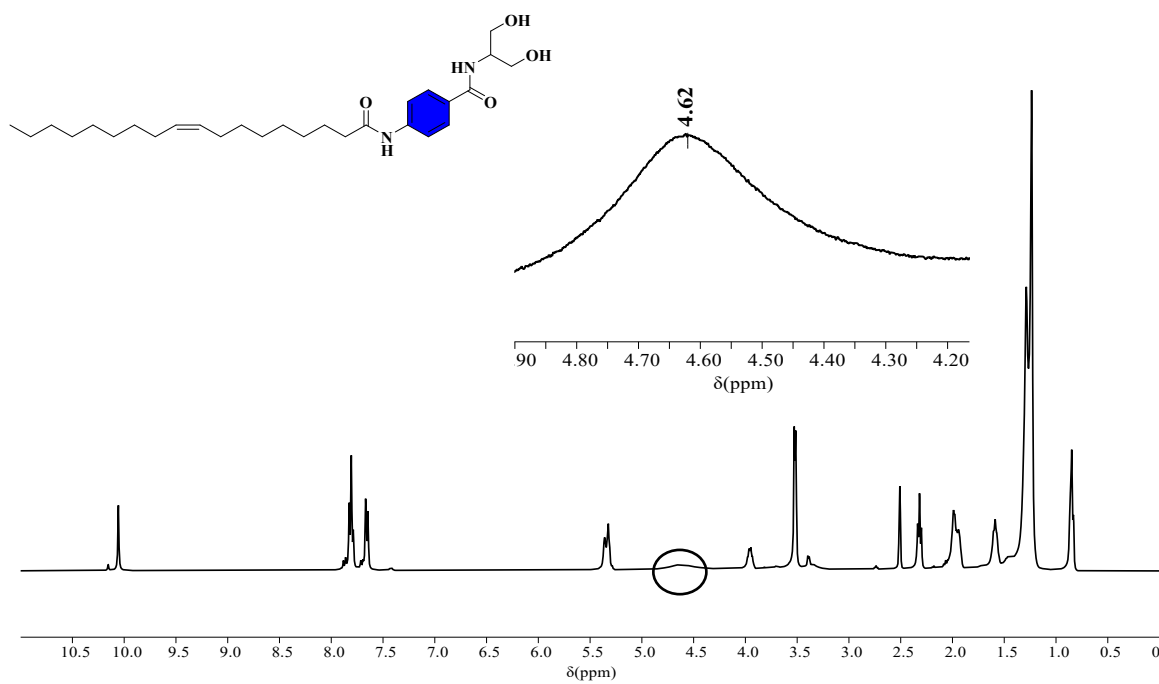

70  
71

**Fig. S3** <sup>1</sup>H NMR spectrum of B<sub>18</sub> in DMSO-d<sub>6</sub> solvent.

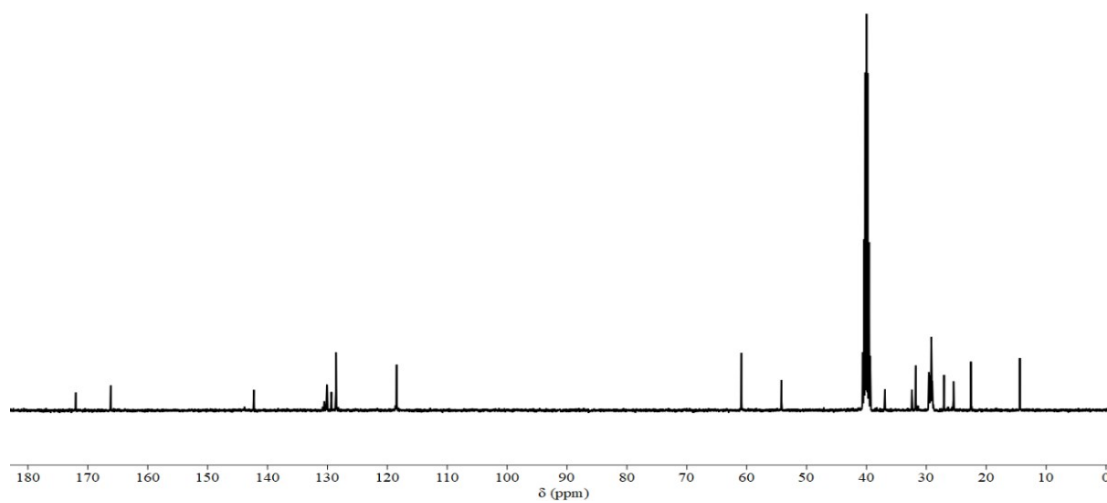

72  
73  
74

**Fig. S4** <sup>13</sup>C NMR spectrum of B<sub>18</sub> in DMSO-d<sub>6</sub> solvent.

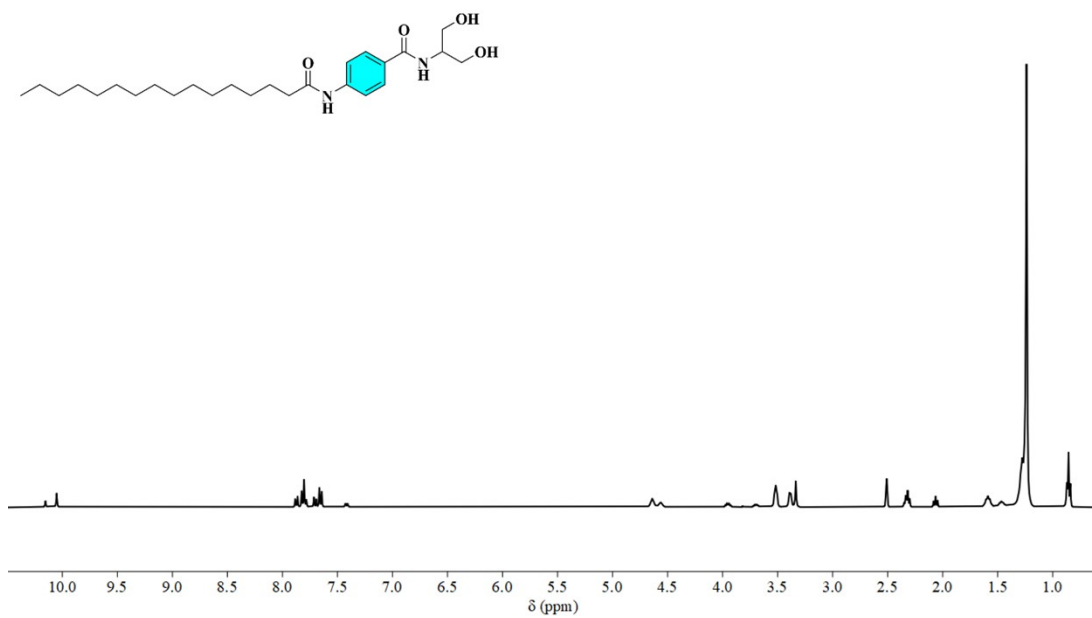

75  
76

**Fig. S5** <sup>1</sup>H NMR spectrum of A<sub>16</sub> in DMSO-d<sub>6</sub> solvent.

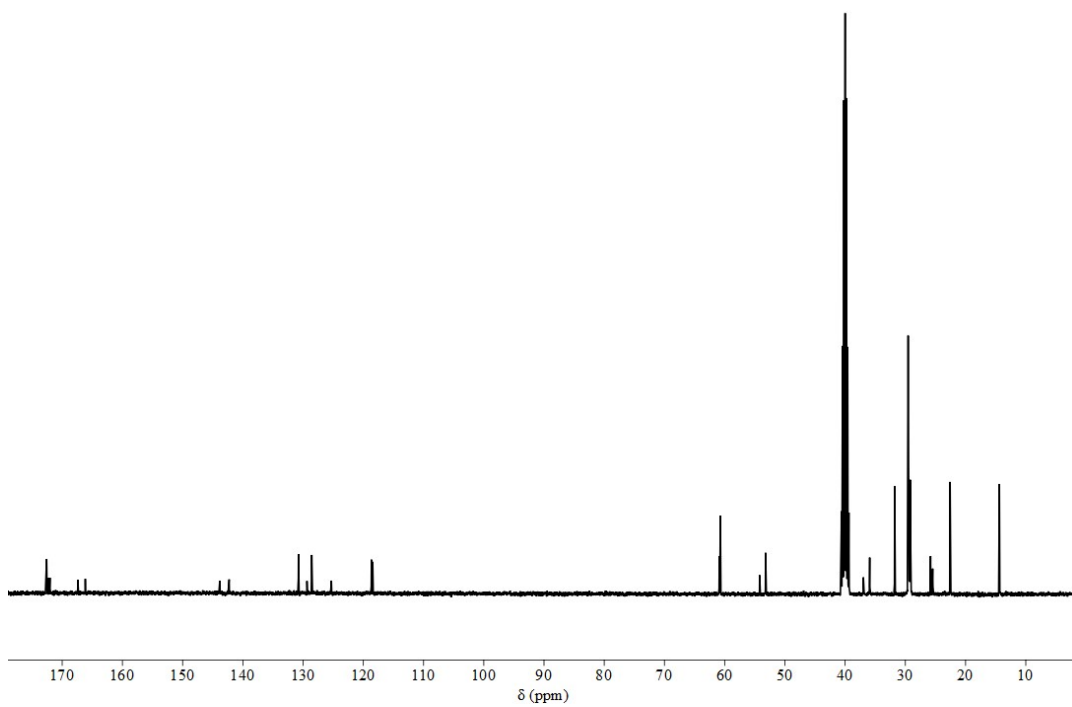

77  
78  
79

**Fig. S6** <sup>13</sup>C NMR spectrum of A<sub>16</sub> in DMSO-d<sub>6</sub> solvent.

80

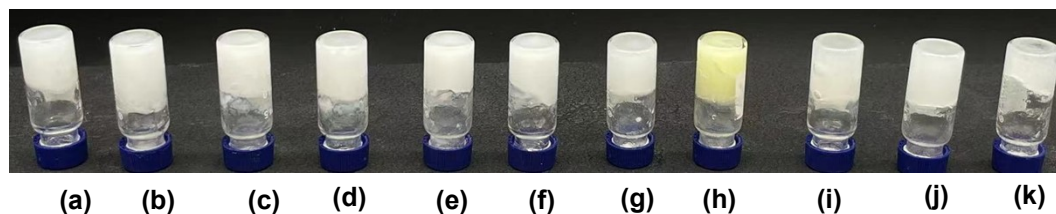

81

82 **Fig. S7** The gelation test of  $A_{16}$  in (a) Cyclohexane, (b) Dodecane, (c) Tridecane, (d) Tetradecane, (e)  
83 Pentadecane, (f) Hexadecane, (g) Paraffin, (h) Diesel, (i) Kerosene, (j) Benzene, (k) Toluene.

84

85

86

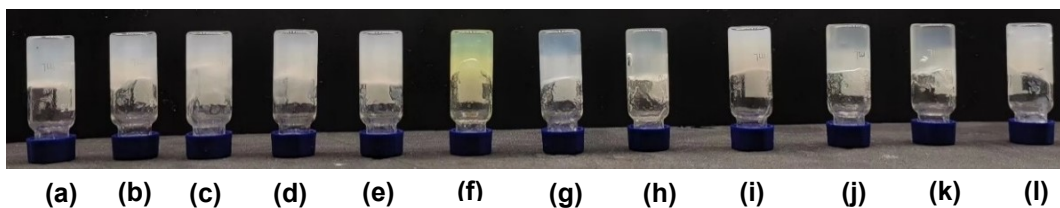

87

88 **Fig. S8** The gelation test of  $B_{18}$  in (a) Paraffin, (b) Dodecane, (c) Tridecane, (d) Tetradecane, (e)  
89 Pentadecane, (f) Diesel, (g) Kerosene, (h) Toluene, (i) Dichloromethane, (j) Benzene, (k) Xylene, (l)  
90 Hexadecane.

91

92

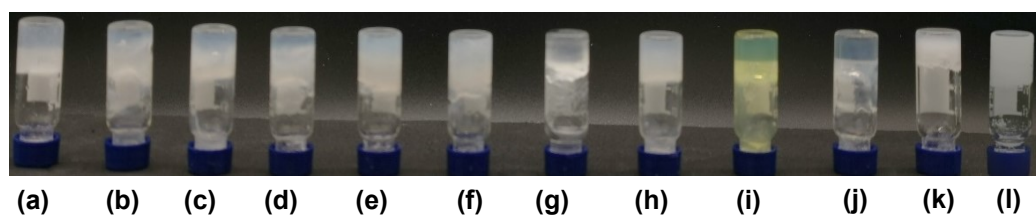

93

94 **Fig. S9** The gelation test of  $A_{18}$  in (a) Cyclohexane, (b) Dodecane, (c) Tridecane, (d) Tetradecane, (e)  
95 Pentadecane, (f) Hexadecane, (g) Xylene, (h) Paraffin, (i) Diesel, (j) Kerosene, (k) Dichloromethane, (l)  
96 Acetone.

97

98

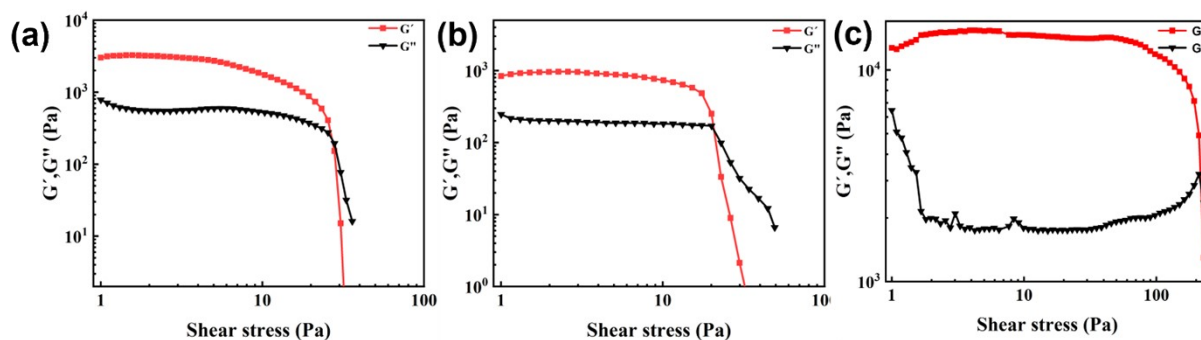

99  
100  
101  
102  
103  
104  
105

**Fig. S10** Stress sweep of organogel (1.00% w/v) in dodecane: (a) A<sub>16</sub>, (b) B<sub>18</sub> and (c) A<sub>18</sub> at 25 °C.

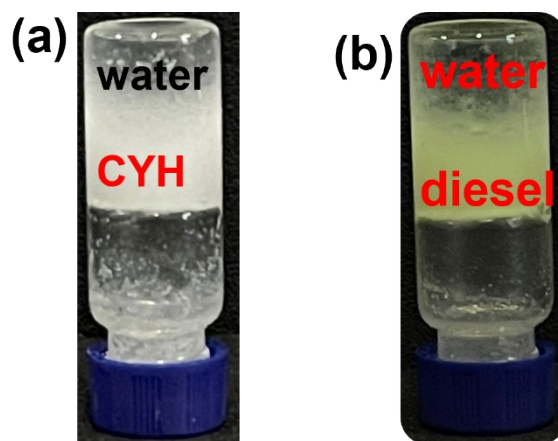

106  
107  
108  
109  
110  
111  
112  
113  
114

**Fig. S11** (a) Organogel in cyclohexene -water mixture (volume: water: CYH = 1:1) and (b) organogel in diesel-water mixture (volume ratio: water: diesel = 1:1), CYH = cyclohexene.



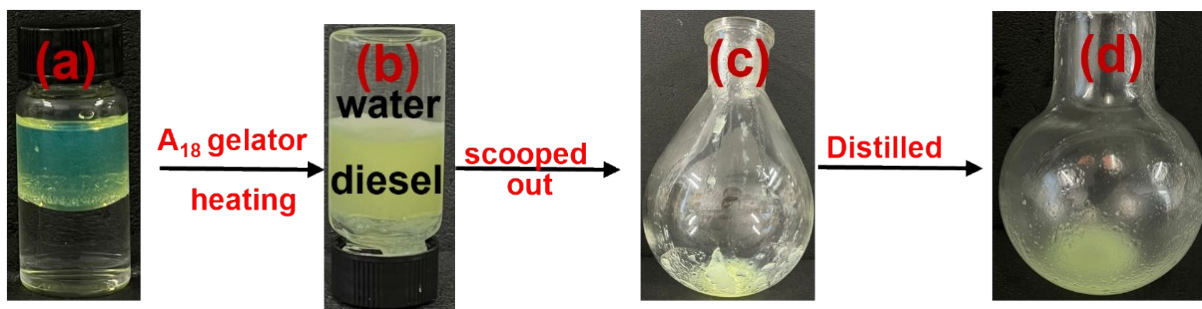

115

116

117 **Fig. S12** (a) Diesel-water mixture, (b) formation of organogel, (c) transfer of the diesel organogel to a  
118 flask with a circular bottom and (d) recovery of diesel by vacuum distillation from the organogel.

119

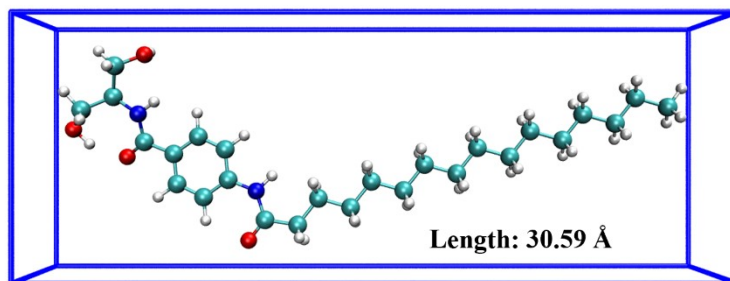

**Fig. S13** Structure and length of A<sub>16</sub>.

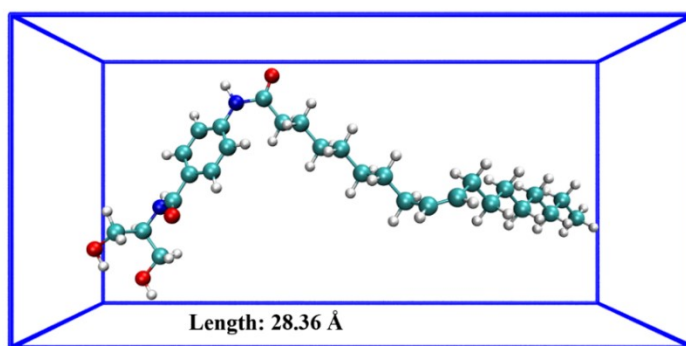

**Fig. S14** Structure and length of B<sub>18</sub>.

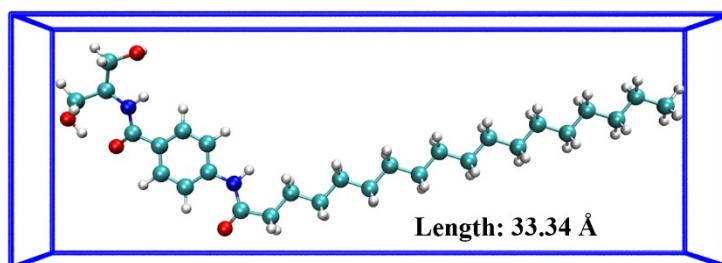

**Fig. S15** Structure and length of A<sub>18</sub>.

120  
121

122

123

124

125

126

127

128

129

130

131

132

133

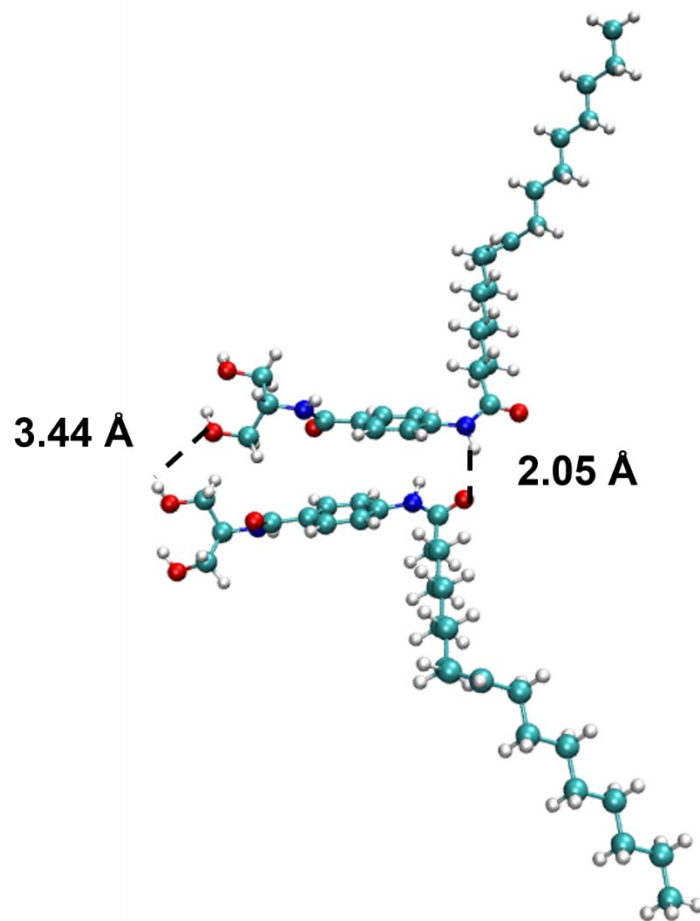

Fig. S16 Dimer structures of B<sub>18</sub> (consistent with Fig.3e in the main text).

134  
135  
136  
137  
138  
139

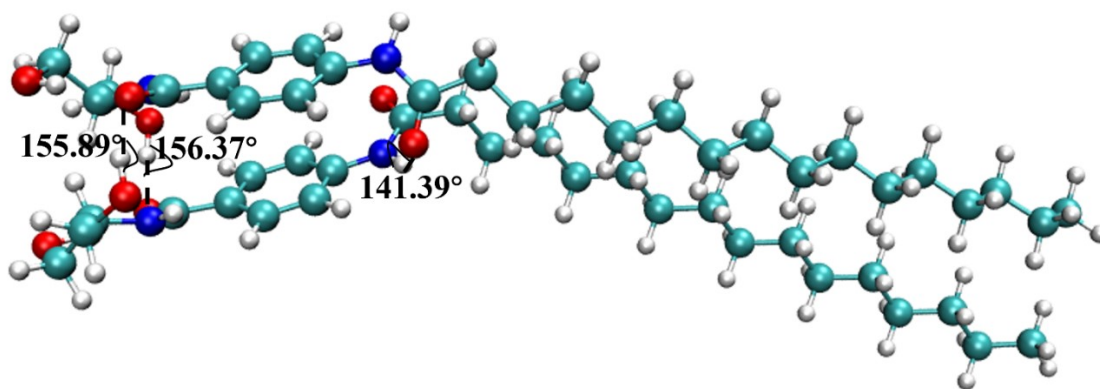

Fig. S17 Important bond angles in the A<sub>16</sub> dimer.

140  
141  
142  
143  
144  
145

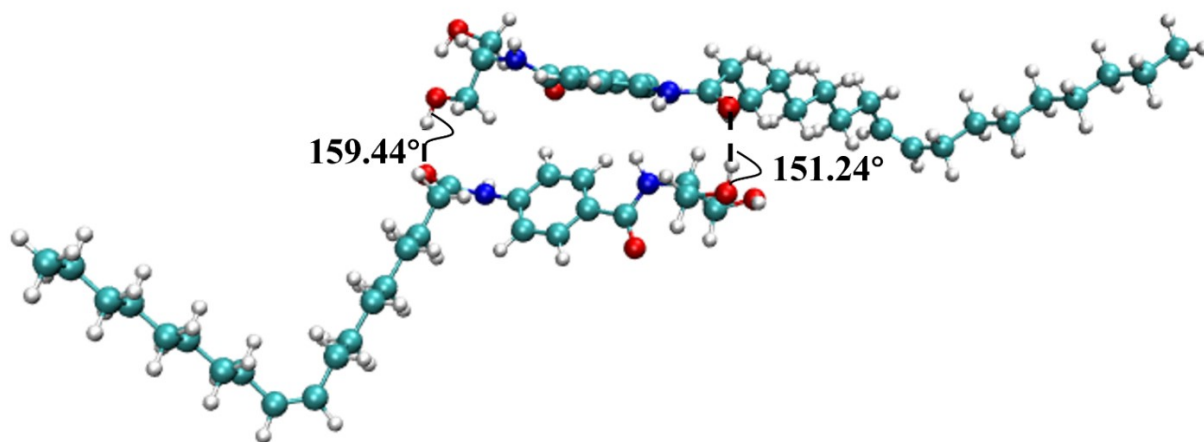

Fig. S18 Important bond angles in the B<sub>18</sub> dimer.

146  
147  
148  
149  
150  
151  
152  
153  
154

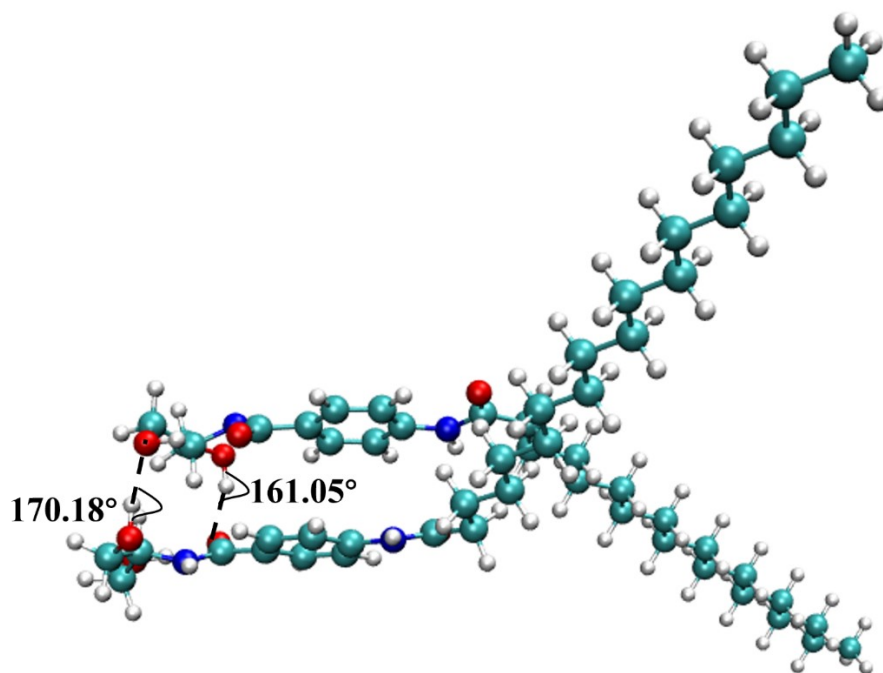

Fig. S19 Important angles in the A<sub>18</sub> dimer.

155  
156  
157  
158

159  
160  
161  
162  
163  
164  
165  
166  
167  
168

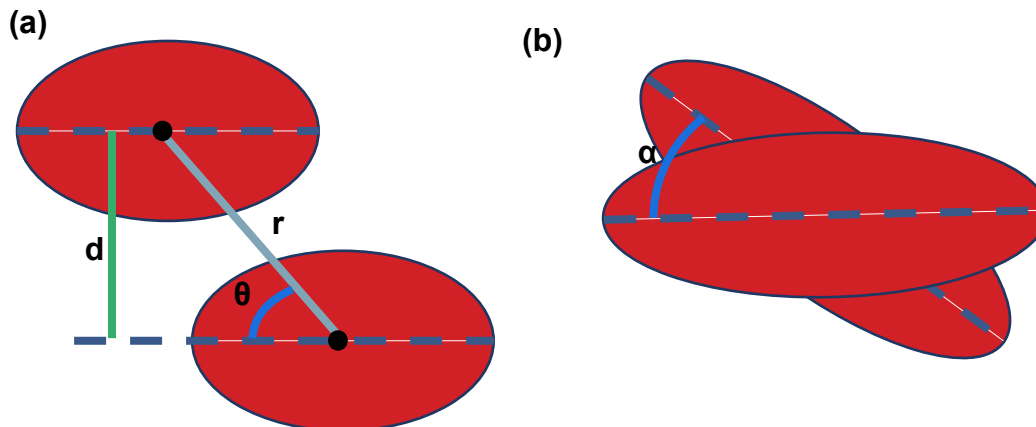

169 **Fig. S20** Schematic diagram of slipping angle ( $\theta$ ) and rotational angle ( $\alpha$ ) of  $\pi$ - $\pi$  stacking.  $d$  is the spacing  
170 between the two benzene rings and  $r$  is the distance between the centers of the two benzene rings. For (a)  
171 side view, (b) top view. The  $d$  represents the distance between the two benzene rings, and the  $r$  represents  
172 the distance between the centers of the two benzene rings.

173  
174  
175  
176

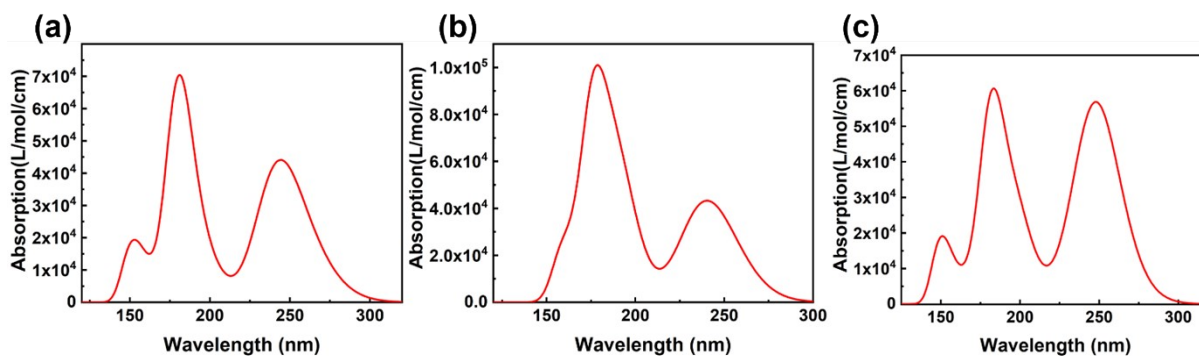

177  
178  
179  
180  
181  
182

179 **Fig. S21** UV spectroscopy calculated by Gaussian 09 for dimer of (a)  $A_{16}$ , (b)  $B_{18}$  and (c)  $A_{18}$ . TD-DFT  
180 was utilized to calculate UV at the M06-2x/6-311G(d,p) level.
